# Supplementary material for: OAT10/SLC22A13 Acts as a Renal Urate Re-Absorber: Clinico-Genetic and Functional Analyses With Pharmacological Impacts
Source: Frontiers journal article supplement (doi:10.3389/fphar.2022.842717), 2022-04-06
Supplement: Data_Sheet_1.pdf [file Data_Sheet_1.pdf]

## Supplementary Material

### 1 Supplementary Figures

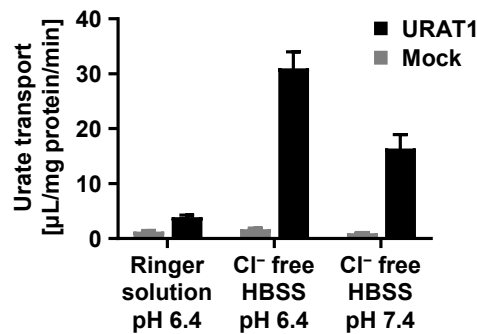

**Supplementary Figure S1 | Effects of the differences in transport buffer composition on URAT1-mediated urate transport.** Transiently URAT1-expressing 293A cells were subjected to a cell-based urate transport assay, 48 h after transfection. As a transport buffer, Ringer solution, which contains Cl<sup>-</sup>, or Cl<sup>-</sup>-free Hanks' Balanced Salt Solution (HBSS) containing 10 μM [8-<sup>14</sup>C]-urate was used. In Cl<sup>-</sup>-free HBSS (pH 6.4), higher URAT1-dependent urate transport activity was detected rather than in Ringer solution (pH 6.4). Acidic pH-dependent urate transport activities of URAT1 in Cl<sup>-</sup>-free HBSS were found. Data are expressed as the mean ± SD; *n* = 4.

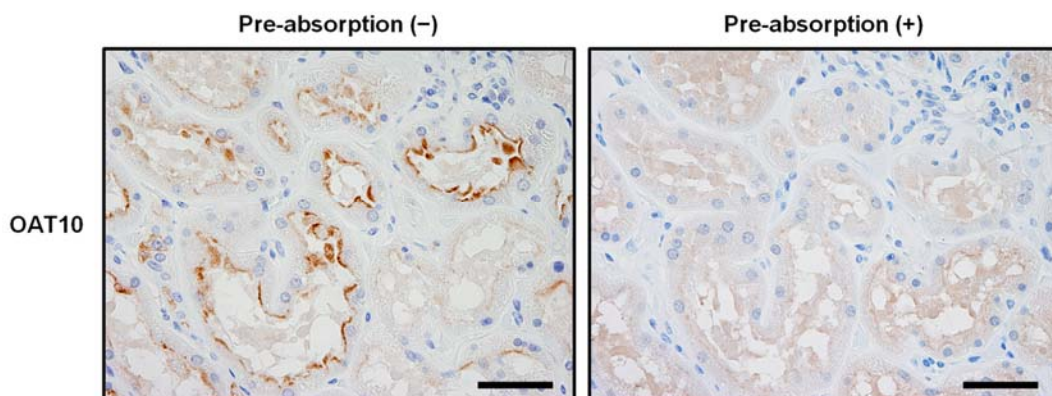

**Supplementary Figure S2 | Immunohistochemical detection of OAT10 on the luminal membranes of the renal proximal tubules verified by antigen absorption test.** Serial sections of the normal part of the human kidney obtained from a male patient with renal cell carcinoma were analyzed with the anti-OAT10 antibody (1:20 diluted) that was generated in this study. *Left*, stained positively with the anti-OAT10 antibody; *right*, loss of luminal staining following pre-incubation of the primary antibody with OAT10 peptides. These data demonstrate the specificity of the anti-OAT10 antibody. Bars, 50 μm.

## 2 Supplementary Tables

## Supplementary Table S1 | Key resources.

| REAGENT or RESOURCE                                                                      | SOURCE                               | IDENTIFIER                                                                      |
|------------------------------------------------------------------------------------------|--------------------------------------|---------------------------------------------------------------------------------|
| <i>Antibodies</i>                                                                        |                                      |                                                                                 |
| Rabbit polyclonal anti-OAT10                                                             | Generated for this paper             |                                                                                 |
| Dako EnVision™ Kit/HRP                                                                   | Dako                                 | Cat# K1491                                                                      |
| Rabbit polyclonal anti-EGFP                                                              | Life technologies                    | Cat# A11122; RRID: AB_221569                                                    |
| Rabbit polyclonal anti- $\alpha$ -tubulin                                                | Abcam                                | Cat# ab15246; RRID: AB_301787                                                   |
| Donkey anti-rabbit IgG-horseradish peroxidase (HRP)-conjugate (3F2/D8) Podocalyxin/gp135 | GE Healthcare                        | Cat# NA934V; RRID: AB_772206                                                    |
|                                                                                          | Developmental Studies Hybridoma Bank | Cat# 3F2/D8; RRID: AB_2618385                                                   |
| Goat anti-Mouse IgG (H+L) Cross-Adsorbed Secondary Antibody, Alexa Fluor 546             | Thermo Fisher Scientific             | Cat# A-11003; RRID: AB_2534071                                                  |
| <i>Chemicals</i>                                                                         |                                      |                                                                                 |
| [8- <sup>14</sup> C]-Uric acid (53 mCi/mmol)                                             | American Radiolabeled Chemicals      | Cat# ARC0513                                                                    |
| Uric Acid                                                                                | FUJIFILM Wako Pure Chemical          | Cat# 210-00225; CAS: 69-93-2                                                    |
| Clear-sol II                                                                             | Nacalai Tesque                       | Cat# 09136-83                                                                   |
| Dimethyl Sulfoxide                                                                       | Nacalai Tesque                       | Cat# 13445-74; CAS: 67-68-5                                                     |
| Polyethelenimine "MAX" (PEI-MAX)                                                         | Polysciences                         | Cat# 24765; CAS: 49553-93-7                                                     |
| 6-Hydroxybenzbromarone                                                                   | Alsachim                             | Cat# C7859; CAS: 152831-00-0                                                    |
| Allopurinol                                                                              | FUJIFILM Wako Pure Chemical          | Cat# 019-12502; CAS: 315-30-0                                                   |
| Benzbromarone                                                                            | FUJIFILM Wako Pure Chemical          | Cat# 028-15851; CAS: 3562-84-3                                                  |
| Dotinurad                                                                                | Kindly provided from Fuji Yakuhin    | FYU-981; CAS: 1285572-51-1                                                      |
| Febuxostat                                                                               | Tokyo Chemical Industry              | Cat# F0847; CAS: 144060-53-7                                                    |
| Fenofibrate                                                                              | Sigma-Aldrich                        | Cat# F6020; CAS: 49562-28-9                                                     |
| Lesinurad                                                                                | Sigma-Aldrich                        | Cat# SML1607; CAS: 878672-00-5                                                  |
| Losartan potassium                                                                       | LKT laboratories                     | Cat# L5873; CAS: 124750-99-8                                                    |
| Oxypurinol                                                                               | FUJIFILM Wako Pure Chemical          | Cat# 151-02761; CAS: 2465-59-0                                                  |
| Probenecid                                                                               | Sigma-Aldrich                        | Cat# P8761; CAS: 57-66-9                                                        |
| Topiroxostat                                                                             | MedChemExpress                       | Cat# HY-14874; CAS: 577778-58-6                                                 |
| <i>Critical Commercial Assays</i>                                                        |                                      |                                                                                 |
| Pierce™ BCA Protein Assay Reagent A                                                      | Thermo Fisher Scientific             | Cat# 23223                                                                      |
| Pierce™ BCA Protein Assay Reagent B                                                      | Thermo Fisher Scientific             | Cat# 23224                                                                      |
| PureLink™ HiPure Plasmid Filter Midiprep Kit                                             | Thermo Fisher Scientific             | Cat# K210015                                                                    |
| <i>Recombinant DNA</i>                                                                   |                                      |                                                                                 |
| The complete human OAT10 cDNA                                                            | Higashino <i>et al.</i> , 2020 (1)   | NCBI Ref Sequence: NM_004256                                                    |
| The complete human URAT1 cDNA                                                            | Toyoda <i>et al.</i> , 2020 (2)      | NCBI Ref Sequence: NM_144585.3                                                  |
| <i>Experimental Models: Cell Lines</i>                                                   |                                      |                                                                                 |
| 293A                                                                                     | Invitrogen                           | R70507                                                                          |
| MDCKII                                                                                   | Toyoda <i>et al.</i> , 2016 (3)      | N/A                                                                             |
| <i>Software and Algorithms</i>                                                           |                                      |                                                                                 |
| Excel 2019                                                                               | Microsoft                            | <a href="https://www.microsoft.com/ja-jp/">https://www.microsoft.com/ja-jp/</a> |
| GraphPad Prism 8                                                                         | GraphPad Software                    | <a href="https://www.graphpad.com/">https://www.graphpad.com/</a>               |

N/A, not available.

**Supplementary Table S2 | Association between a dysfunctional variant of *OAT10/SLC22A13*, rs117371763 (c.1129C>T, p.R377C) and serum urate levels in a Japanese male population (1129C/C vs. 1129C/T).**

|                     | Genotypes at c.1129C>T |             | P value                 | $\beta$ | 95%CI           |
|---------------------|------------------------|-------------|-------------------------|---------|-----------------|
|                     | C/C                    | C/T         |                         |         |                 |
| Serum urate [mg/dL] | 6.04 ± 0.02            | 5.90 ± 0.06 | 3.52 × 10 <sup>-2</sup> | -0.135  | -0.260 – -0.009 |
| Number              | 4,128                  | 384         |                         |         |                 |

Data are expressed as mean ± SEM.

CI, confidence interval.

**Supplementary Table S3 | Association between a dysfunctional variant of *OAT10/SLC22A13*, rs117371763 (c.1129C>T, p.R377C) and FE<sub>UA</sub> in a Japanese male population (1129C/C vs. 1129C/T).**

|                      | Genotypes at c.1129C>T |             | P value                 | $\beta$ | 95%CI         |
|----------------------|------------------------|-------------|-------------------------|---------|---------------|
|                      | C/C                    | C/T         |                         |         |               |
| FE <sub>UA</sub> [%] | 4.02 ± 0.06            | 4.63 ± 0.20 | 1.91 × 10 <sup>-3</sup> | 0.611   | 0.226 – 0.997 |
| Number               | 1,369                  | 143         |                         |         |               |

Data are expressed as mean ± SEM.

CI, confidence interval; FE<sub>UA</sub>, fractional excretion of uric acid.

**Supplementary Table S4 | Association between a dysfunctional variant of *OAT10/SLC22A13*, rs117371763 (c.1129C>T, p.R377C) and serum urate levels in a Japanese male population (1129C/C vs. 1129C/T + 1129T/T).**

|                     | Genotypes at c.1129C>T |             | P value                 | $\beta$ | 95%CI           |
|---------------------|------------------------|-------------|-------------------------|---------|-----------------|
|                     | C/C                    | C/T + T/T   |                         |         |                 |
| Serum urate [mg/dL] | 6.04 ± 0.02            | 5.90 ± 0.06 | 2.31 × 10 <sup>-2</sup> | -0.144  | -0.268 – -0.020 |
| Number              | 4,128                  | 393         |                         |         |                 |

Data are expressed as mean ± SEM.

CI, confidence interval.

**Supplementary Table S5 | Association between a dysfunctional variant of *OAT10/SLC22A13*, rs117371763 (c.1129C>T, p.R377C) and FE<sub>UA</sub> in a Japanese male population (1129C/C vs. 1129C/T + 1129T/T).**

|                      | Genotypes at c.1129C>T |             | P value                 | $\beta$ | 95%CI         |
|----------------------|------------------------|-------------|-------------------------|---------|---------------|
|                      | C/C                    | C/T + T/T   |                         |         |               |
| FE <sub>UA</sub> [%] | 4.02 ± 0.06            | 4.57 ± 0.20 | 4.28 × 10 <sup>-3</sup> | 0.552   | 0.174 – 0.930 |
| Number               | 1,369                  | 149         |                         |         |               |

Data are expressed as mean ± SEM.

CI, confidence interval; FE<sub>UA</sub>, fractional excretion of uric acid.

**Supplementary Table S6 | Interaction scores to estimate the possible inhibition of OAT10 and URAT1 by each tested compound based on plasma concentrations.** As an interaction score, we determined the value of  $f_u C_{\max}/IC_{50}$ ; the large value of this score reflects the possibility of inhibition by tested compounds in humans at clinical dose.

| Compounds              | $f_u$ * | $C_{\max}$<br>[ $\mu$ M] * | $f_u C_{\max}$<br>[ $\mu$ M] | with OAT10              |                                                  | with URAT1              |                                                  |
|------------------------|---------|----------------------------|------------------------------|-------------------------|--------------------------------------------------|-------------------------|--------------------------------------------------|
|                        |         |                            |                              | $IC_{50}$<br>[ $\mu$ M] | Interaction scores<br>[ $f_u C_{\max}/IC_{50}$ ] | $IC_{50}$<br>[ $\mu$ M] | Interaction scores<br>[ $f_u C_{\max}/IC_{50}$ ] |
| Benzbromarone          | 0.037   | 5.4                        | $2.0 \times 10^{-1}$         | 37.2                    | $5.4 \times 10^{-3}$                             | 0.817                   | 0.25                                             |
| 6-Hydroxybenzbromarone | N/A     | N/A                        | N/A                          | 15.9                    | N/A                                              | 0.477                   | N/A                                              |
| Dotinurad              | 0.007   | 1.2                        | $8.4 \times 10^{-3}$         | 7.7                     | $1.1 \times 10^{-3}$                             | 0.043                   | 0.20                                             |
| Lesinurad              | 0.019   | 78.8                       | 1.5                          | 13.6                    | 0.11                                             | 14.6                    | 0.10                                             |
| Losartan               | 0.020   | 1.4                        | $2.8 \times 10^{-2}$         | 2.5                     | $1.1 \times 10^{-2}$                             | 11.9                    | $2.4 \times 10^{-3}$                             |

\* These values are from previous studies (4, 5).  $IC_{50}$ , the half-maximal inhibitory concentration values of target compounds against urate transport by OAT10 or URAT1;  $f_u$ , the fraction of drug unbound in human plasma;  $C_{\max}$ , maximum concentration in human plasma;  $f_u C_{\max}$ , maximum unbound concentration in human plasma; N/A, not available.

### 3 Supplementary References

1. Higashino T, Morimoto K, Nakaoka H, Toyoda Y, Kawamura Y, Shimizu S, et al. Dysfunctional missense variant of OAT10/SLC22A13 decreases gout risk and serum uric acid levels. *Ann Rheum Dis* (2020) 79(1):164-6. doi: 10.1136/annrheumdis-2019-216044. PubMed PMID: 31780526; PubMed Central PMCID: PMC6937405.
2. Toyoda Y, Takada T, Saito H, Hirata H, Ota-Kontani A, Kobayashi N, et al. Inhibitory effect of Citrus flavonoids on the in vitro transport activity of human urate transporter 1 (URAT1/SLC22A12), a renal re-absorber of urate. *NPJ Sci Food* (2020) 4:3. doi: 10.1038/s41538-020-0063-7. PubMed PMID: 32047858; PubMed Central PMCID: PMC7002704.
3. Toyoda Y, Takada T, Miyata H, Ishikawa T, Suzuki H. Regulation of the Axillary Osmidrosis-Associated ABCC11 Protein Stability by N-Linked Glycosylation: Effect of Glucose Condition. *PLoS One* (2016) 11(6):e0157172. doi: 10.1371/journal.pone.0157172. PubMed PMID: 27281343; PubMed Central PMCID: PMC4900533.
4. Taniguchi T, Ashizawa N, Matsumoto K, Saito R, Motoki K, Sakai M, et al. Pharmacological Evaluation of Dotinurad, a Selective Urate Reabsorption Inhibitor. *J Pharmacol Exp Ther* (2019) 371(1):162-70. doi: 10.1124/jpet.119.259341. PubMed PMID: 31371478.
5. Miyata H, Takada T, Toyoda Y, Matsuo H, Ichida K, Suzuki H. Identification of Febuxostat as a New Strong ABCG2 Inhibitor: Potential Applications and Risks in Clinical Situations. *Front Pharmacol* (2016) 7:518. doi: 10.3389/fphar.2016.00518. PubMed PMID: 28082903; PubMed Central PMCID: PMC5187494.
